# Supplementary material
Source: PubMed Central journal article supplement (PMC6413783)

**Supplemental Table 1.** Cell subset numbers determined by viSNE.

| Cell Subset                  | Median Frequency (IQR)                                             |                                                                    | KW p-value | FDR q-value |
|------------------------------|--------------------------------------------------------------------|--------------------------------------------------------------------|------------|-------------|
|                              | MMF-                                                               | MMF+                                                               |            |             |
| Total Cells/mL               | 2.80x10 <sup>7</sup> (2.40x10 <sup>7</sup> -3.42x10 <sup>7</sup> ) | 1.30x10 <sup>7</sup> (1.30x10 <sup>7</sup> -2.30x10 <sup>7</sup> ) | 0.1580     | 0.4550      |
| Monocytes                    | 3.03x10 <sup>6</sup> (1.53x10 <sup>6</sup> -3.62x10 <sup>6</sup> ) | 1.42x10 <sup>6</sup> (1.18x10 <sup>6</sup> -1.96x10 <sup>6</sup> ) | 0.2210     | 0.4550      |
| Dendritic Cells              | 2.32x10 <sup>5</sup> (8.57x10 <sup>4</sup> -3.30x10 <sup>5</sup> ) | 1.35x10 <sup>5</sup> (5.70x10 <sup>4</sup> -1.85x10 <sup>5</sup> ) | 0.3910     | 0.5213      |
| Plasmacytoid Dendritic Cells | 1.40x10 <sup>5</sup> (7.64x10 <sup>4</sup> -4.32x10 <sup>5</sup> ) | 9.24x10 <sup>4</sup> (5.45x10 <sup>4</sup> -1.05x10 <sup>5</sup> ) | 0.2210     | 0.4550      |
| CD4+ Monocytes               | 3.94x10 <sup>5</sup> (1.45x10 <sup>5</sup> -1.02x10 <sup>6</sup> ) | 2.92x10 <sup>5</sup> (1.28x10 <sup>5</sup> -4.24x10 <sup>5</sup> ) | 0.3270     | 0.4550      |
| B Cells                      | 2.49x10 <sup>6</sup> (9.31x10 <sup>5</sup> -5.64x10 <sup>5</sup> ) | 1.15x10 <sup>6</sup> (1.02x10 <sup>6</sup> -1.66x10 <sup>6</sup> ) | 0.3270     | 0.4550      |
| Switched Memory B Cells      | 2.45x10 <sup>5</sup> (9.57x10 <sup>4</sup> -5.43x10 <sup>5</sup> ) | 1.41x10 <sup>5</sup> (1.18x10 <sup>5</sup> -1.54x10 <sup>5</sup> ) | 0.2700     | 0.4550      |
| Plasmablasts                 | 5.46x10 <sup>4</sup> (2.94x10 <sup>4</sup> -1.46x10 <sup>5</sup> ) | 4914 (4578-8203)                                                   | 0.0500     | 0.4550      |
| Transitional B Cells         | 3696 (705-1.32x10 <sup>4</sup> )                                   | 546 (0-3780)                                                       | 0.5330     | 0.6400      |
| Naïve B Cells                | 1.70x10 <sup>6</sup> (6.56x10 <sup>5</sup> -4.18x10 <sup>6</sup> ) | 8.10x10 <sup>5</sup> (6.00x10 <sup>5</sup> -1.11x10 <sup>6</sup> ) | 0.2700     | 0.4550      |
| IgD-CD27- DN B cells         | 1.41x10 <sup>5</sup> (5.77x10 <sup>4</sup> -2.39x10 <sup>5</sup> ) | 1.25x10 <sup>5</sup> (1.00x10 <sup>5</sup> -1.99x10 <sup>5</sup> ) | 0.5400     | 0.6400      |
| CCR6+ B Cells                | 9.30x10 <sup>5</sup> (4.93x10 <sup>5</sup> -1.41x10 <sup>6</sup> ) | 2.59x10 <sup>5</sup> (2.03x10 <sup>5</sup> -3.52x10 <sup>5</sup> ) | 0.0864     | 0.4550      |
| T Cells                      | 1.97x10 <sup>7</sup> (1.81x10 <sup>7</sup> -2.42x10 <sup>7</sup> ) | 1.00x10 <sup>7</sup> (9.50x10 <sup>6</sup> -1.54x10 <sup>7</sup> ) | 0.0500     | 0.4550      |
| CD4+ T Cells                 | 1.39x10 <sup>7</sup> (7.19x10 <sup>6</sup> -1.48x10 <sup>7</sup> ) | 6.76x10 <sup>6</sup> (4.50x10 <sup>6</sup> -9.68x10 <sup>6</sup> ) | 0.1110     | 0.4550      |
| CD8+ T Cells                 | 5.08x10 <sup>6</sup> (3.31x10 <sup>6</sup> -7.92x10 <sup>6</sup> ) | 3.29x10 <sup>6</sup> (2.26x10 <sup>6</sup> -4.27x10 <sup>6</sup> ) | 0.2210     | 0.4550      |
| TCRγδ T Cells                | 1.88x10 <sup>5</sup> (1.33x10 <sup>5</sup> -4.74x10 <sup>5</sup> ) | 1.17x10 <sup>5</sup> (1.16x10 <sup>5</sup> -2.17x10 <sup>5</sup> ) | 0.3270     | 0.4550      |
| CD4+ Memory T Cells          | 5.75x10 <sup>6</sup> (2.94x10 <sup>6</sup> -6.33x10 <sup>6</sup> ) | 3.41x10 <sup>6</sup> (2.46x10 <sup>6</sup> -4.78x10 <sup>6</sup> ) | 0.4620     | 0.5914      |
| CD8+ Memory T Cells          | 7.89x10 <sup>5</sup> (4.98x10 <sup>5</sup> -1.17x10 <sup>6</sup> ) | 4.38x10 <sup>5</sup> (2.99x10 <sup>5</sup> -6.85x10 <sup>5</sup> ) | 0.1780     | 0.4550      |
| CD4+ Central Memory T Cells  | 2.95x10 <sup>6</sup> (1.53x10 <sup>6</sup> -3.91x10 <sup>6</sup> ) | 1.20x10 <sup>6</sup> (1.06x10 <sup>6</sup> -1.87x10 <sup>6</sup> ) | 0.0864     | 0.4550      |
| CD8+ Central Memory T Cells  | 5.36x10 <sup>4</sup> (3.55x10 <sup>4</sup> -1.18x10 <sup>5</sup> ) | 4.94x10 <sup>4</sup> (4.26x10 <sup>4</sup> -8.03x10 <sup>4</sup> ) | 0.8060     | 0.8597      |
| CD4+ Effector Memory T Cells | 1.60x10 <sup>6</sup> (1.13x10 <sup>6</sup> -2.26x10 <sup>6</sup> ) | 1.34x10 <sup>6</sup> (1.23x10 <sup>6</sup> -1.72x10 <sup>6</sup> ) | 0.9030     | 0.9030      |
| CD8+ Effector Memory T Cells | 4.96x10 <sup>5</sup> (2.62x10 <sup>5</sup> -5.33x10 <sup>5</sup> ) | 1.79x10 <sup>5</sup> (1.55x10 <sup>5</sup> -3.60x10 <sup>5</sup> ) | 0.1780     | 0.4550      |

|                             |                                                                    |                                                                    |        |        |
|-----------------------------|--------------------------------------------------------------------|--------------------------------------------------------------------|--------|--------|
| CD4+ Naïve/Effector T Cells | 6.48x10 <sup>6</sup> (3.85x10 <sup>6</sup> -9.22x10 <sup>6</sup> ) | 3.32x10 <sup>6</sup> (2.02x10 <sup>6</sup> -3.46x10 <sup>6</sup> ) | 0.0662 | 0.4550 |
| CD8+ Naïve/Effector T Cells | 4.25x10 <sup>6</sup> (2.43x10 <sup>6</sup> -5.74x10 <sup>6</sup> ) | 2.39x10 <sup>6</sup> (1.96x10 <sup>6</sup> -3.72x10 <sup>6</sup> ) | 0.2210 | 0.4550 |
| CD4+ CXCR5+ T Cells         | 7.44x10 <sup>5</sup> (4.44x10 <sup>5</sup> -1.37x10 <sup>6</sup> ) | 4.63x10 <sup>5</sup> (2.86x10 <sup>5</sup> -8.64x10 <sup>5</sup> ) | 0.3270 | 0.4550 |
| CD4+ Th1-type T Cells       | 1.67x10 <sup>6</sup> (8.94x10 <sup>5</sup> -2.29x10 <sup>6</sup> ) | 6.96x10 <sup>5</sup> (6.41x10 <sup>5</sup> -9.03x10 <sup>5</sup> ) | 0.2700 | 0.4550 |
| CD8+ Tc1-type T Cells       | 1.18x10 <sup>6</sup> (7.49x10 <sup>5</sup> -2.13x10 <sup>6</sup> ) | 7.73x10 <sup>5</sup> (4.99x10 <sup>5</sup> -7.81x10 <sup>5</sup> ) | 0.2700 | 0.4550 |
| CD4+ CCR6+ T Cells          | 3.44x10 <sup>5</sup> (1.74x10 <sup>5</sup> -5.80x10 <sup>5</sup> ) | 1.00x10 <sup>5</sup> (9.30x10 <sup>4</sup> -1.48x10 <sup>5</sup> ) | 0.0500 | 0.4550 |
| NKT Cells                   | 5.56x10 <sup>4</sup> (1.59x10 <sup>4</sup> -1.26x10 <sup>5</sup> ) | 8.36x10 <sup>4</sup> (7.16x10 <sup>4</sup> -1.66x10 <sup>5</sup> ) | 0.8060 | 0.8597 |
| NK Cells                    | 1.23x10 <sup>6</sup> (6.55x10 <sup>5</sup> -2.09x10 <sup>6</sup> ) | 9.37x10 <sup>5</sup> (5.79x10 <sup>5</sup> -1.47x10 <sup>6</sup> ) | 0.6240 | 0.7131 |
| CD57+ NK Cells              | 5.04x10 <sup>5</sup> (2.54x10 <sup>5</sup> -8.54x10 <sup>5</sup> ) | 3.93x10 <sup>5</sup> (2.64x10 <sup>5</sup> -8.48x10 <sup>5</sup> ) | 0.9030 | 0.9030 |
| CD57- NK Cells              | 5.77x10 <sup>5</sup> (3.23x10 <sup>5</sup> -7.71x10 <sup>5</sup> ) | 4.16x10 <sup>5</sup> (3.14x10 <sup>5</sup> -5.22x10 <sup>5</sup> ) | 0.3270 | 0.4550 |

**Supplemental Table 2.** Cell numbers determined by bivariate plots.

|                              | Cell Surface Designation                                    | Median (Interquartile Range)                                       |                                                                    | KW<br>p-value | FDR<br>q-value |
|------------------------------|-------------------------------------------------------------|--------------------------------------------------------------------|--------------------------------------------------------------------|---------------|----------------|
|                              |                                                             | MMF-                                                               | MMF+                                                               |               |                |
| Total Cells/mL               | All live intact cells                                       | 2.80x10 <sup>7</sup> (2.40x10 <sup>7</sup> -3.42x10 <sup>7</sup> ) | 1.30x10 <sup>7</sup> (1.30x10 <sup>7</sup> -2.30x10 <sup>7</sup> ) | 0.1580        | 0.4125         |
| Monocytes                    | HLA-DR+CD11c+CD14+CD16±                                     | 1.70x10 <sup>6</sup> (7.32x10 <sup>5</sup> -2.66x10 <sup>6</sup> ) | 7.86x10 <sup>5</sup> (7.63x10 <sup>5</sup> -8.42x10 <sup>5</sup> ) | 0.3910        | 0.5001         |
| Dendritic Cells              | HLA-DR+CD11c+CD14-CD16-                                     | 4.09x10 <sup>5</sup> (2.53x10 <sup>5</sup> -5.16x10 <sup>5</sup> ) | 1.61x10 <sup>5</sup> (1.45x10 <sup>5</sup> -3.82x10 <sup>5</sup> ) | 0.2210        | 0.4125         |
| Plasmacytoid Dendritic Cells | HLA-DR+CD11c-CD123+                                         | 3.35x10 <sup>4</sup> (2.49x10 <sup>4</sup> -7.70x10 <sup>4</sup> ) | 1.38x10 <sup>4</sup> (1.09x10 <sup>4</sup> -1.75x10 <sup>4</sup> ) | 0.0864        | 0.3394         |
| Classical Monocytes          | HLA-DR+CD11c+CD14+CD16-                                     | 1.50x10 <sup>6</sup> (6.91x10 <sup>5</sup> -2.49x10 <sup>6</sup> ) | 6.98x10 <sup>5</sup> (6.80x10 <sup>5</sup> -8.04x10 <sup>5</sup> ) | 0.3910        | 0.5001         |
| Non-Classical Monocytes      | HLA-DR+CD11c+CD14 <sup>lo</sup> CD16+                       | 1.10x10 <sup>5</sup> (2.85x10 <sup>4</sup> -1.76x10 <sup>5</sup> ) | 5.68x10 <sup>4</sup> (2.38x10 <sup>4</sup> -7.64x10 <sup>5</sup> ) | 0.6240        | 0.6729         |
| Intermediate Monocytes       | HLA-DR+CD11c+CD14+CD16+                                     | 1.26 <sup>4</sup> (1642-1.68x10 <sup>4</sup> )                     | 2910 (1660-1.39x10 <sup>4</sup> )                                  | 0.7120        | 0.7399         |
| Mo-MDSCs*                    | CD14+CD11b+CD33+HLA-DR-                                     | 4394 (2256-2.83x10 <sup>4</sup> )                                  | 5.60x10 <sup>4</sup> (3320-3.38x10 <sup>5</sup> )                  | 0.4620        | 0.5775         |
| Conventional Dendritic Cells | HLA-DR+CD11c+CD14-CD16-<br>CD11b+                           | 2.21x10 <sup>5</sup> (1.33x10 <sup>5</sup> -2.64x10 <sup>5</sup> ) | 7.86x10 <sup>4</sup> (5.48x10 <sup>4</sup> -1.83x10 <sup>5</sup> ) | 0.2700        | 0.4125         |
| CXCR3+ Dendritic Cells       | HLA-DR+CD11c+CD14-CD16-<br>CD11b+CXCR3+                     | 5.31x10 <sup>4</sup> (4.13x10 <sup>4</sup> -8.35x10 <sup>4</sup> ) | 2.46x10 <sup>4</sup> (2.02x10 <sup>4</sup> -3.53x10 <sup>4</sup> ) | 0.0662        | 0.3394         |
| Basophils                    | HLA-DR-CD11c-CD123+                                         | 4.03x10 <sup>4</sup> (1.71x10 <sup>4</sup> -6.74x10 <sup>4</sup> ) | 2.06x10 <sup>4</sup> (3873-5.56x10 <sup>4</sup> )                  | 0.5400        | 0.6061         |
| B Cells                      | CD3-CD19+                                                   | 1.96x10 <sup>6</sup> (6.64x10 <sup>5</sup> -4.41x10 <sup>6</sup> ) | 7.79x10 <sup>5</sup> (6.43x10 <sup>5</sup> -8.57x10 <sup>5</sup> ) | 0.2210        | 0.4125         |
| Switched Memory B Cells      | CD3-CD19+IgD-CD27+CD38-                                     | 1.25x10 <sup>5</sup> (5.46x10 <sup>4</sup> -1.57x10 <sup>5</sup> ) | 4.03x10 <sup>4</sup> (3.45x10 <sup>4</sup> -5.86x10 <sup>4</sup> ) | 0.0864        | 0.3394         |
| Non-switched Memory B cells  | CD3-CD19+IgD+CD27+                                          | 1.28x10 <sup>5</sup> (5.79x10 <sup>4</sup> -2.31x10 <sup>5</sup> ) | 5.31x10 <sup>4</sup> (4.07x10 <sup>4</sup> -1.15x10 <sup>5</sup> ) | 0.3270        | 0.4861         |
| Plasmablasts                 | CD3-CD19+IgD-CD27+CD38+                                     | 6.88x10 <sup>4</sup> (5.47x10 <sup>4</sup> -1.05x10 <sup>5</sup> ) | 3.44x10 <sup>4</sup> (1.38x10 <sup>4</sup> -5.18x10 <sup>4</sup> ) | 0.0864        | 0.3394         |
| Transitional B Cells         | CD3-CD19+IgD+CD27-<br>CD24 <sup>hi</sup> CD38 <sup>hi</sup> | 2.44x10 <sup>4</sup> (9268-4.18x10 <sup>4</sup> )                  | 1044 (593-8576)                                                    | 0.0200        | 0.3394         |
| Naïve B Cells                | CD3-CD19+IgD+CD27-<br>CD24±CD38±                            | 1.27x10 <sup>6</sup> (3.87x10 <sup>5</sup> -2.75x10 <sup>6</sup> ) | 4.10x10 <sup>5</sup> (3.12x10 <sup>5</sup> -5.28x10 <sup>5</sup> ) | 0.2700        | 0.4125         |
| IgD-CD27- DN B cells         | CD3-CD19+IgD-CD27-                                          | 2.16x10 <sup>5</sup> (9.27x10 <sup>4</sup> -4.42x10 <sup>5</sup> ) | 1.60x10 <sup>5</sup> (1.36x10 <sup>5</sup> -2.70x10 <sup>5</sup> ) | 0.8060        | 0.8209         |

|                              |                                       |                                                                    |                                                                    |        |        |
|------------------------------|---------------------------------------|--------------------------------------------------------------------|--------------------------------------------------------------------|--------|--------|
| T Cells                      | CD3+CD56-                             | 1.78x10 <sup>7</sup> (1.62x10 <sup>6</sup> -2.19x10 <sup>7</sup> ) | 8.51x10 <sup>6</sup> (8.27x10 <sup>6</sup> -1.33x10 <sup>7</sup> ) | 0.0500 | 0.3394 |
| CD4+ T Cells                 | CD3+CD56-CD4+CD8-                     | 1.17x10 <sup>7</sup> (6.62x10 <sup>6</sup> -1.35x10 <sup>7</sup> ) | 5.70x10 <sup>6</sup> (3.77x10 <sup>6</sup> -8.26x10 <sup>6</sup> ) | 0.0864 | 0.3394 |
| CD8+ T Cells                 | CD3+CD56-CD4-CD8+                     | 4.36x10 <sup>6</sup> (3.25x10 <sup>6</sup> -7.19x10 <sup>6</sup> ) | 3.04x10 <sup>6</sup> (1.77x10 <sup>6</sup> -3.65x10 <sup>6</sup> ) | 0.2700 | 0.4125 |
| TCR $\gamma\delta$ T Cells   | CD3+CD56-CD4-CD8-TCR $\gamma\delta$ + | 8.20x10 <sup>4</sup> (3.78x10 <sup>4</sup> -2.27x10 <sup>5</sup> ) | 2.58x10 <sup>4</sup> (1.48x10 <sup>4</sup> -1.15x10 <sup>5</sup> ) | 0.2700 | 0.4125 |
| CD4+ Memory T Cells          | CD3+CD56-CD4+CD45RA-                  | 6.40x10 <sup>6</sup> (4.20x10 <sup>6</sup> -7.08x10 <sup>6</sup> ) | 3.13x10 <sup>6</sup> (2.52x10 <sup>6</sup> -5.71x10 <sup>6</sup> ) | 0.1420 | 0.4125 |
| CD8+ Memory T Cells          | CD3+CD56-CD8+CD45RA-                  | 1.46x10 <sup>6</sup> (7.69x10 <sup>5</sup> -1.98x10 <sup>6</sup> ) | 8.03x10 <sup>5</sup> (5.45x10 <sup>5</sup> -1.35x10 <sup>6</sup> ) | 0.3910 | 0.5001 |
| CD4+ Central Memory T Cells  | CD3+CD56-CD4+CD45RA-CCR7+             | 4.10x10 <sup>6</sup> (2.04x10 <sup>6</sup> -4.31x10 <sup>6</sup> ) | 1.54x10 <sup>6</sup> (1.50x10 <sup>6</sup> -2.32x10 <sup>6</sup> ) | 0.1110 | 0.4070 |
| CD8+ Central Memory T Cells  | CD3+CD56-CD8+CD45RA-CCR7+             | 1.02x10 <sup>6</sup> (4.99x10 <sup>5</sup> -1.14x10 <sup>6</sup> ) | 6.43x10 <sup>5</sup> (4.35x10 <sup>5</sup> -7.55x10 <sup>5</sup> ) | 0.3910 | 0.5001 |
| CD4+ Effector Memory T Cells | CD3+CD56-CD4+CD45RA-CCR7-             | 2.43x10 <sup>6</sup> (1.82x10 <sup>6</sup> -2.85x10 <sup>6</sup> ) | 1.62x10 <sup>6</sup> (1.01x10 <sup>6</sup> -2.44x10 <sup>6</sup> ) | 0.5400 | 0.6061 |
| CD8+ Effector Memory T Cells | CD3+CD56-CD8+CD45RA-CCR7-             | 4.48x10 <sup>5</sup> (2.12x10 <sup>5</sup> -7.00x10 <sup>5</sup> ) | 1.80x10 <sup>5</sup> (1.52x10 <sup>5</sup> -4.20x10 <sup>5</sup> ) | 0.1780 | 0.4125 |
| CD4+ Naïve/Effector T Cells  | CD3+CD56-CD4+CD45RA+                  | 4.94x10 <sup>6</sup> (2.99x10 <sup>6</sup> -7.10x10 <sup>6</sup> ) | 2.56x10 <sup>6</sup> (1.32x10 <sup>6</sup> -2.62x10 <sup>6</sup> ) | 0.0864 | 0.3394 |
| CD8+ Naïve/Effector T Cells  | CD3+CD56-CD8+CD45RA+                  | 2.84x10 <sup>6</sup> (1.84x10 <sup>6</sup> -4.81x10 <sup>6</sup> ) | 1.66x10 <sup>6</sup> (1.20x10 <sup>6</sup> -2.47x10 <sup>6</sup> ) | 0.2210 | 0.4125 |
| CD4+ Treg-type T Cells       | CD3+CD56-CD4+CD25+CD127-              | 5.66x10 <sup>5</sup> (3.22x10 <sup>5</sup> -7.05x10 <sup>5</sup> ) | 2.11x10 <sup>5</sup> (1.97x10 <sup>5</sup> -2.97x10 <sup>5</sup> ) | 0.0500 | 0.3394 |
| CD8+ Treg-type T Cells       | CD3+CD56-CD8+CD25+CD127-              | 8.87x10 <sup>4</sup> (6.42x10 <sup>4</sup> -2.89x10 <sup>5</sup> ) | 6.25x10 <sup>4</sup> (3.67x10 <sup>4</sup> -8.52x10 <sup>4</sup> ) | 0.1780 | 0.4125 |
| CD4+ Tfh-type T Cells        | CD3+CD56-CD4+CXCR5+PD-1+              | 1.04x10 <sup>5</sup> (6.69x10 <sup>4</sup> -2.04x10 <sup>5</sup> ) | 7.64x10 <sup>4</sup> (5.26x10 <sup>4</sup> -1.52x10 <sup>5</sup> ) | 0.5400 | 0.6061 |
| CD8+ Tfh-type T Cells        | CD3+CD56-CD8+CXCR5+PD-1+              | 1.79x10 <sup>4</sup> (1.09x10 <sup>4</sup> -2.79x10 <sup>4</sup> ) | 1.06x10 <sup>4</sup> (9048-1.10x10 <sup>4</sup> )                  | 0.2210 | 0.4125 |
| CD4+ Th1-type T Cells        | CD3+CD56-CD4+CXCR3+                   | 4.20x10 <sup>6</sup> (3.00x10 <sup>6</sup> -6.79x10 <sup>6</sup> ) | 2.04x10 <sup>6</sup> (1.78x10 <sup>6</sup> -2.61x10 <sup>6</sup> ) | 0.0864 | 0.3394 |
| CD8+ Tc1-type T Cells        | CD3+CD56-CD8+CXCR3+                   | 2.58x10 <sup>6</sup> (1.86x10 <sup>6</sup> -3.47x10 <sup>6</sup> ) | 1.83x10 <sup>6</sup> (9.82x10 <sup>5</sup> -2.11x10 <sup>6</sup> ) | 0.1420 | 0.4125 |
| CD4+ Th17-type T Cells       | CD3+CD56-CD4+CCR6+CD161+              | 1.57x10 <sup>5</sup> (8.58x10 <sup>4</sup> -2.86x10 <sup>5</sup> ) | 7.66x10 <sup>4</sup> (6.91x10 <sup>4</sup> -7.99x10 <sup>4</sup> ) | 0.0373 | 0.3394 |
| CD4+ CD57+ T Cells           | CD3+CD56-CD4+CD57+                    | 1.51x10 <sup>5</sup> (5.99x10 <sup>4</sup> -3.44x10 <sup>5</sup> ) | 5.29x10 <sup>4</sup> (2.87x10 <sup>4</sup> -1.88x10 <sup>5</sup> ) | 0.2700 | 0.4125 |
| CD8+ CD57+ T Cells           | CD3+CD56-CD8+CD57+                    | 2.85x10 <sup>4</sup> (8939-5.97x10 <sup>4</sup> )                  | 5643 (2611-5934)                                                   | 0.2210 | 0.4125 |
| NKT Cells                    | CD3+CD56+                             | 4.63x10 <sup>5</sup> (1.50x10 <sup>5</sup> -6.97x10 <sup>5</sup> ) | 5.55x10 <sup>5</sup> (2.47x10 <sup>5</sup> -7.41x10 <sup>5</sup> ) | 0.9030 | 0.9030 |
| NK Cells                     | CD3-CD19-CD56+                        | 1.24x10 <sup>6</sup> (5.82x10 <sup>5</sup> -2.46x10 <sup>6</sup> ) | 2.96x10 <sup>5</sup> (2.23x10 <sup>5</sup> -1.71x10 <sup>6</sup> ) | 0.1780 | 0.4125 |

|                        |                                                |                                                                |                                                                |        |        |
|------------------------|------------------------------------------------|----------------------------------------------------------------|----------------------------------------------------------------|--------|--------|
| CD16-CD56hi NK Cells   | CD3-CD19-CD56-CD16+                            | $1.06 \times 10^5$ ( $3.17 \times 10^4$ - $1.30 \times 10^5$ ) | $3.27 \times 10^4$ ( $2.78 \times 10^4$ - $7.29 \times 10^4$ ) | 0.2700 | 0.4125 |
| CD16+CD56med NK Cells  | CD3-CD19-CD56+CD16+                            | $6.81 \times 10^5$ ( $3.07 \times 10^5$ - $1.34 \times 10^6$ ) | $9.13 \times 10^4$ ( $7.96 \times 10^4$ - $1.56 \times 10^6$ ) | 0.3910 | 0.5001 |
| CD16-CD56lo NK Cells   | CD3-CD19-CD56+CD16-                            | $1.14 \times 10^5$ ( $3.66 \times 10^4$ - $4.60 \times 10^5$ ) | $2.76 \times 10^4$ ( $2.63 \times 10^4$ - $1.03 \times 10^5$ ) | 0.2210 | 0.4125 |
| CD94hiCD56hi NK Cells  | CD3-CD19-CD56 <sup>hi</sup> CD94 <sup>hi</sup> | $3.19 \times 10^4$ ( $9557$ - $1.52 \times 10^5$ )             | 7375 ( $4177$ - $7.23 \times 10^4$ )                           | 0.5400 | 0.6061 |
| CD94+CD56med NK Cells  | CD3-CD19-CD56+CD94+                            | $6.27 \times 10^5$ ( $3.65 \times 10^5$ - $1.32 \times 10^6$ ) | $1.90 \times 10^5$ ( $1.71 \times 10^5$ - $1.32 \times 10^6$ ) | 0.2700 | 0.4125 |
| CD94-CD56med NK Cells  | CD3-CD19-CD56+CD94-                            | $5.59 \times 10^5$ ( $2.01 \times 10^5$ - $7.22 \times 10^5$ ) | $9.11 \times 10^4$ ( $4.63 \times 10^4$ - $2.31 \times 10^5$ ) | 0.0662 | 0.3394 |
| CD8hiCD56hi NK Cells   | CD3-CD19-hiCD56+CD8hi                          | $2.40 \times 10^4$ ( $2887$ - $1.73 \times 10^5$ )             | 3951 ( $2066$ - $1.24 \times 10^5$ )                           | 0.6240 | 0.6729 |
| CD8loCD56hi NK Cells   | CD3-CD19-loCD56+CD8lo                          | $4.89 \times 10^4$ ( $1.37 \times 10^4$ - $1.68 \times 10^5$ ) | 5918 ( $5794$ - $6.36 \times 10^4$ )                           | 0.3910 | 0.5001 |
| CD8hiCD56med NK Cells  | CD3-CD19-hiCD56+CD8hi                          | $3.19 \times 10^5$ ( $1.10 \times 10^5$ - $4.61 \times 10^5$ ) | $1.10 \times 10^5$ ( $2.33 \times 10^4$ - $7.61 \times 10^5$ ) | 0.7130 | 0.7399 |
| CD8medCD56med NK Cells | CD3-CD19-medCD56+CD8me                         | $2.09 \times 10^5$ ( $7.67 \times 10^4$ - $3.87 \times 10^5$ ) | $4.06 \times 10^4$ ( $2.23 \times 10^4$ - $3.36 \times 10^5$ ) | 0.2210 | 0.4125 |
| CD8loCD56med NK Cells  | CD3-CD19-loCD56+CD8lo                          | $5.45 \times 10^5$ ( $2.89 \times 10^5$ - $1.01 \times 10^6$ ) | $1.70 \times 10^5$ ( $1.31 \times 10^5$ - $3.06 \times 10^5$ ) | 0.0373 | 0.3394 |
| CD57+CD56+ NK Cells    | CD3-CD19-CD56+CD57+                            | $5.16 \times 10^5$ ( $2.29 \times 10^5$ - $8.36 \times 10^5$ ) | $1.55 \times 10^5$ ( $8.34 \times 10^4$ - $8.07 \times 10^5$ ) | 0.2700 | 0.4125 |
| CD57-CD56+ NK Cells    | CD3-CD19-CD56+CD57-                            | $6.00 \times 10^5$ ( $3.26 \times 10^5$ - $8.39 \times 10^5$ ) | $1.25 \times 10^5$ ( $1.23 \times 10^4$ - $5.91 \times 10^5$ ) | 0.0864 | 0.3394 |
| CD57-CD56hi NK Cells   | CD3-CD19-CD56+CD57-                            | $9.41 \times 10^4$ ( $2.32 \times 10^4$ - $3.28 \times 10^5$ ) | $1.27 \times 10^4$ ( $1.21 \times 10^4$ - $1.83 \times 10^5$ ) | 0.5400 | 0.6061 |

**Supplemental Table 3.** Significant frequency differences in surface marker expression by cell subset.

|                                                          | Median (Interquartile Range) |                     | KW      | FDR     |
|----------------------------------------------------------|------------------------------|---------------------|---------|---------|
|                                                          | MMF-                         | MMF+                | p-value | q-value |
| <b>CXCR3+ Dendritic Cells</b>                            |                              |                     |         |         |
| <b>CD38+</b>                                             | 86.86 (79.04-89.08)          | 68.27 (68.00-73.47) | 0.0101  | 0.0441  |
| <b>CXCR5+</b>                                            | 5.05 (3.27-12.14)            | 16.55 (16.27-16.77) | 0.0143  | 0.0441  |
| <b>Basophils</b>                                         |                              |                     |         |         |
| <b>CCR7+</b>                                             | 1.83 (0.00-1.54)             | 21.39 (6.06-23.81)  | 0.0261  | 0.0441  |
| <b>CD85j+</b>                                            | 2.19 (1.01-7.73)             | 12.70 (11.76-23.53) | 0.0373  | 0.0441  |
| <b>B Cells</b>                                           |                              |                     |         |         |
| <b>CD28+</b>                                             | 0.65 (0.44-1.54)             | 5.33 (2.33-6.00)    | 0.0275  | 0.0441  |
| <b>CD38+</b>                                             | 50.10 (46.01-56.56)          | 39.86 (32.13-41.04) | 0.0373  | 0.0441  |
| <b>Memory B Cells</b>                                    |                              |                     |         |         |
| <b>CD28+</b>                                             | 0.82 (0.19-1.66)             | 2.53 (1.87-3.18)    | 0.0142  | 0.0441  |
| <b>HLA-DR+</b>                                           | 98.46 (97.34-99.60)          | 95.48 (95.45-95.70) | 0.0275  | 0.0441  |
| <b>CD86+</b>                                             | 46.72 (38.61-50.01)          | 18.48 (7.32-38.88)  | 0.0373  | 0.0441  |
| <b>Non-switched Memory B cells</b>                       |                              |                     |         |         |
| <b>PD-1+</b>                                             | 0.09 (0.00-0.19)             | 0.47 (0.43-0.50)    | 0.0126  | 0.0441  |
| <b>CCR6+</b>                                             | 24.15 (22.79-47.22)          | 17.09 (15.28-17.52) | 0.0200  | 0.0441  |
| <b>Plasmablasts</b>                                      |                              |                     |         |         |
| <b>CD28+</b>                                             | 1.08 (0.39-3.08)             | 10.89 (5.65-17.83)  | 0.0101  | 0.0441  |
| <b>CCR6+</b>                                             | 21.24 (17.45-27.85)          | 8.60 (6.69-8.97)    | 0.0373  | 0.0441  |
| <b>Transitional B Cells</b>                              |                              |                     |         |         |
| <b>HLA-DR<sup>Hi</sup></b>                               | 47.54 (35.77-54.41)          | 25.00 (7.25-30.88)  | 0.0083  | 0.0441  |
| <b>Naïve B cells</b>                                     |                              |                     |         |         |
| <b>CCR6+</b>                                             | 40.25 (28.29-55.18)          | 22.33 (21.65-24.73) | 0.0143  | 0.0441  |
| <b>CD38+</b>                                             | 58.04 (49.88-70.51)          | 34.35 (34.32-38.44) | 0.0275  | 0.0441  |
| <b>CD86+</b>                                             | 20.11 (12.87-24.65)          | 5.73 (5.02-9.68)    | 0.0373  | 0.0441  |
| <b>T Cells</b>                                           |                              |                     |         |         |
| <b>CCR6+</b>                                             | 1.70 (1.17-2.34)             | 0.94 (0.72-1.28)    | 0.0500  | 0.0500  |
| <b>CD8+ T Cells</b>                                      |                              |                     |         |         |
| <b>CCR6+</b>                                             | 0.76 (0.57-0.92)             | 0.24 (0.35-0.45)    | 0.0500  | 0.0500  |
| <b>CD4+ T Cells</b>                                      |                              |                     |         |         |
| <b>CD38+</b>                                             | 34.45 (29.10-39.99)          | 20.87 (19.49-26.54) | 0.0500  | 0.0500  |
| <b>TCR<math>\gamma</math><math>\delta</math> T cells</b> |                              |                     |         |         |
| <b>HLA-DR+</b>                                           | 8.52 (5.94-10.17)            | 4.87 (3.09-5.44)    | 0.0275  | 0.0441  |
| <b>CXCR5+</b>                                            | 1.19 (0.92-1.96)             | 3.37 (2.28-3.70)    | 0.0500  | 0.0500  |

| <b>CD8+ Memory T Cells</b>          |                     |                     |        |        |
|-------------------------------------|---------------------|---------------------|--------|--------|
| <b>HLA-DR<sup>Hi</sup></b>          | 0.48 (0.27-0.60)    | 0.10 (0.10-0.17)    | 0.0071 | 0.0441 |
| <b>CCR6+</b>                        | 1.06 (0.62-3.02)    | 0.42 (0.27-0.57)    | 0.0275 | 0.0441 |
| <b>CD8+ Central Memory T Cells</b>  |                     |                     |        |        |
| <b>HLA-DR<sup>Hi</sup></b>          | 0.35 (0.21-0.85)    | 0.12 (0.10-0.14)    | 0.0101 | 0.0441 |
| <b>CCR6+</b>                        | 1.39 (0.78-2.04)    | 0.41 (0.24-0.63)    | 0.0275 | 0.0441 |
| <b>CD4+ Effector Memory T Cells</b> |                     |                     |        |        |
| <b>CCR6+</b>                        | 3.69 (3.00-6.53)    | 2.17 (1.69-2.53)    | 0.0275 | 0.0441 |
| <b>HLA-DR+</b>                      | 11.87 (5.98-14.60)  | 4.62 (3.92-6.29)    | 0.0373 | 0.0441 |
| <b>CD4+ Naïve/Effector T Cells</b>  |                     |                     |        |        |
| <b>ICOS+</b>                        | 0.47 (0.29-0.84)    | 1.13 (0.91-1.50)    | 0.0373 | 0.0441 |
| <b>CD4+ Treg-type Cells</b>         |                     |                     |        |        |
| <b>CCR6+</b>                        | 1.18 (0.77-1.92)    | 0.48 (0.38-0.58)    | 0.0485 | 0.0500 |
| <b>CD8+ Treg-type Cells</b>         |                     |                     |        |        |
| <b>HLA-DR<sup>Hi</sup></b>          | 4.10 (3.58-4.52)    | 1.60 (1.10-3.24)    | 0.0373 | 0.0441 |
| <b>CD4+ Tfh-type Cells</b>          |                     |                     |        |        |
| <b>CCR6+</b>                        | 3.11 (2.53-4.26)    | 1.75 (1.34-1.94)    | 0.0373 | 0.0441 |
| <b>CD8+ Tc17-type Cells</b>         |                     |                     |        |        |
| <b>CXCR3+</b>                       | 37.83 (26.92-51.49) | 20.00 (17.97-28.57) | 0.0275 | 0.0441 |
| <b>CD4+CD57+ T Cells</b>            |                     |                     |        |        |
| <b>HLA-DR+</b>                      | 19.38 (15.26-24.71) | 12.34 (8.31-13.61)  | 0.0200 | 0.0441 |
| <b>HLA-DR<sup>Hi</sup></b>          | 2.09 (0.93-2.66)    | 0.33 (0.31-0.46)    | 0.0233 | 0.0441 |
| <b>NKT Cells</b>                    |                     |                     |        |        |
| <b>CCR6+</b>                        | 5.36 (3.17-6.96)    | 1.22 (0.84-4.68)    | 0.0500 | 0.0500 |
| <b>CXCR3+</b>                       | 28.37 (23.72-32.35) | 16.07 (15.71-19.78) | 0.0500 | 0.0500 |

**Supplemental Table 4.** Plasma soluble mediator levels.

| Soluble Mediator | Median Frequency (IQR)       |                            | KW p-value    | FDR q-value |
|------------------|------------------------------|----------------------------|---------------|-------------|
|                  | MMF-                         | MMF+                       |               |             |
| BLyS             | 883.10 (683.73-1027.10)      | 862.70 (741.37-1011.90)    | 1.0000        | 1.0000      |
| CXCL13           | 234.93 (167.46-298.66)       | 218.70 (194.67-247.67)     | 0.7130        | 0.8793      |
| Eotaxin          | 33.33 (27.50-59.24)          | 45.48 (32.87-49.43)        | 0.6240        | 0.8793      |
| G-CSF            | 0.00 (0.00-22.89)            | 20.26 (0.00-20.26)         | 0.6890        | 0.8793      |
| ICAM-1           | 555305 (84520-555305)        | 154883 (113997-220361)     | 0.8060        | 0.8793      |
| IFN- $\beta$     | 2.74 (0.00-8.33)             | 2.29 (0.00-10.9)           | 0.5270        | 0.8793      |
| IL-1RA           | 384.46 (96.37-418.22)        | 385.46 (385.46-385.46)     | 0.4730        | 0.8793      |
| IL-2             | 0.00 (0.00-22.67)            | 41.39 (0.00-42.00)         | 0.1440        | 0.5760      |
| IL-21            | 6.58 (0.00-40.10)            | 8.19 (6.58-14.31)          | 1.0000        | 1.0000      |
| IL-2RA           | 8058.11 (5240.00-15103.22)   | 9719.10 (7894.57-13657.32) | 0.6240        | 0.8793      |
| IL-5             | 6.22 (0.00-12.44)            | 0.00 (0.00-0.00)           | 0.0614        | 0.3615      |
| IL-6             | 0.00 (0.00-19.84)            | 19.84 (0.00-19.84)         | 0.6290        | 0.8793      |
| IL-7             | 5.60 (4.93-9.23)             | 2.64 (1.38-4.83)           | 0.0662        | 0.3615      |
| IL-8             | 1.69 (0.00-3.38)             | 3.38 (0.00-12.20)          | 0.7920        | 0.8793      |
| IP-10            | 49.49 (28.92-60.26)          | 29.19 (18.77-31.13)        | 0.2210        | 0.7956      |
| Leptin           | 34352.56 (22645.50-40222.22) | 40222 (36869-40222)        | 0.7400        | 0.8793      |
| LIF              | 6.66 (6.25-10.52)            | 7.72 (8.44-13.76)          | 0.2700        | 0.8793      |
| MCP-1            | 32.30 (26.58-44.11)          | 19.14 (11.87-30.48)        | 0.0864        | 0.3888      |
| MCP-3            | 113.36 (74.06-145.44)        | 91.42 (44.86-130.01)       | 0.5400        | 0.8793      |
| MIG              | 146.47 (114.22-172.00)       | 87.41 (78.77-105.76)       | <b>0.0200</b> | 0.3300      |
| MIP-1 $\alpha$   | 11.92 (8.72-33.26)           | 23.88 (18.85-46.59)        | 0.3910        | 0.8793      |
| MIP-1 $\beta$    | 99.79 (65.46-165.50)         | 117.32 (46.73-130.74)      | 0.7130        | 0.8793      |
| PAI-1            | 15064 (12095-20488)          | 18252 (17866-19639)        | 0.9020        | 0.9288      |
| PDGF-BB          | 1142.36 (479.40-2311.40)     | 279.96 (183.88-388.33)     | <b>0.0373</b> | 0.3357      |
| RANTES           | 0.00 (0.00-0.00)             | 144.24 (0.00-147.41)       | 0.0703        | 0.3615      |
| Resistin         | 3314.38 (2193.02-4237.60)    | 1912.41 (1853.43-4429.27)  | 0.8060        | 0.8793      |
| sCD40L           | 252.50 (174.49-356.69)       | 159.97 (144.17-564.86)     | 0.5400        | 0.8793      |
| SCF              | 34.33 (21.27-51.56)          | 38.16 (31.23-42.83)        | 0.4620        | 0.8793      |
| SDF-1 $\alpha$   | 367.06 (313.04-496.03)       | 240.74 (213.65-253.91)     | <b>0.0275</b> | 0.3300      |
| sEselectin       | 78474 (83598-94323)          | 70697 (57367-83236)        | 0.7130        | 0.8793      |
| sFasL            | 13.91 (4.12-17.97)           | 5.99 (4.12-9.51)           | 0.3180        | 0.8793      |
| TNF- $\alpha$    | 4.36 (1.09-4.36)             | 4.36 (4.36-4.36)           | 0.6900        | 0.8793      |
| TNFR1            | 1344.54 (1044.84-2165.68)    | 2186.00 (1729.40-2304.82)  | 0.3270        | 0.8793      |
| TNFR2            | 320.30 (288.57-385.19)       | 385.19 (308.54-385.19)     | 0.5190        | 0.8793      |
| TRAIL            | 27.58 (18.82-35.77)          | 26.20 (22.59-28.38)        | 0.9030        | 0.9288      |
| VCAM-1           | 4281.48 (4281.48-4281.48)    | 4281.48 (4281.48-4281.48)  | 0.4800        | 0.8793      |
| VEGF-A           | 417.23 (303.83-741.27)       | 157.76 (115.70-188.67)     | <b>0.0007</b> | 0.0792      |



**Supplemental Table 5.** SLE patient demographics, medications and clinical features.

| <b>Mycophenolate Mofetil Treatment Demographics</b> |                        |                       |                |
|-----------------------------------------------------|------------------------|-----------------------|----------------|
|                                                     | <b>MMF-<br/>(n=10)</b> | <b>MMF+<br/>(n=5)</b> | <b>p-value</b> |
| Age (Mean±SD)                                       | 47.2 (8.0)             | 42.8 (9.8)            | 0.3556         |
| Mean SLEDAI (Range)                                 | 3.8 (0-8)              | 3.2 (0-6)             | 0.8122         |
| Gender (Female)                                     | 10 (100%)              | 5 (100%)              | -              |
| Race (European)                                     | 4 (40%)                | 2 (40%)               | -              |
| Race (African)                                      | 6 (60%)                | 3 (60%)               | -              |
| <b>Medication</b>                                   |                        |                       |                |
| Prednisone                                          | 4 (40%)                | 3 (60%)               | -              |
| Azathioprine                                        | 2 (20%)                | 0 (0%)                | -              |
| Hydroxychloroquine/Quinacrine                       | 7 (70%)                | 4 (80%)               | -              |
| Infliximab                                          | 1 (10%)                | 0 (0%)                | -              |
| <b>Manifestations</b>                               |                        |                       |                |
| Arthritis                                           | 10 (100%)              | 5 (100%)              | -              |
| Oral Ulcers                                         | 8 (80%)                | 5 (100%)              | -              |
| Malar Rash                                          | 9 (90%)                | 3 (60%)               | -              |
| Photosensitivity                                    | 5 (50%)                | 3 (60%)               | -              |
| Immunologic Criteria                                | 2 (20%)                | 3 (60%)               | -              |
| Serositis                                           | 6 (60%)                | 3 (60%)               | -              |
| Leukopenia                                          | 1 (10%)                | 2 (40%)               | -              |
| Lymphopenia                                         | 3 (30%)                | 2 (40%)               | -              |
| Renal Disease                                       | 3 (30%)                | 2 (40%)               | -              |
| CNS Disease                                         | 0 (0%)                 | 1 (20%)               | -              |
| Discoid Rash                                        | 2 (20%)                | 1 (20%)               | -              |
| Hemolytic Anemia                                    | 1 (10%)                | 0 (0%)                | -              |
| Thrombocytopenia                                    | 1 (10%)                | 0 (0%)                | -              |

**Supplemental Table 6.** Antibodies and elemental isotope tags.

| <b>Antigen Target<br/>(Human)</b> | <b>Clone<br/>Number</b> | <b>Supplier</b>  | <b>Elemental<br/>Isotope</b> |
|-----------------------------------|-------------------------|------------------|------------------------------|
| CCR6                              | IA9                     | BD               | Gd155                        |
| CCR7                              | 150503                  | R&D Systems      | Gd160                        |
| CD11b                             | ICRF44                  | BioLegend        | Eu153                        |
| CD11c                             | Bu15                    | BioLegend        | Nd148                        |
| CD123                             | 9F5                     | BD               | Yb173                        |
| CD127                             | A019D5                  | BioLegend        | Ho165                        |
| CD14                              | M5E2                    | BioLegend        | Sm154                        |
| CD16                              | 3G8                     | BioLegend        | Sm149                        |
| CD161                             | DX12                    | BD               | Er170                        |
| CD19                              | SJ25C1                  | Southern Biotech | Nd142                        |
| CD20                              | 2H7                     | BioLegend        | Dy164                        |
| CD24                              | ML5                     | BioLegend        | Er168                        |
| CD25                              | M-A251                  | BD               | Yb176                        |
| CD27                              | L128                    | BD               | Sm152                        |
| CD28                              | L293                    | BD               | Er167                        |
| CD3                               | UCHT1                   | BD               | Nd150                        |
| CD33                              | P67.8                   | BD               | Er166                        |
| CD38                              | HB-7                    | BD               | Eu151                        |
| CD4                               | SK3                     | BioLegend        | Nd143                        |
| CD45RA                            | HI100                   | BioLegend        | Dy162                        |
| CD56                              | NCAM16.2                | BD               | Yb174                        |
| CD57                              | HCD57                   | BioLegend        | In113                        |
| CD8                               | SK1                     | BioLegend        | Nd144                        |
| CD85j                             | 292319                  | R&D Systems      | Sm147                        |
| CD86                              | IT2.2                   | BioLegend        | Gd157                        |
| CD94                              | HP-3D9                  | BD               | Gd156                        |
| CXCR3                             | G025H7                  | BioLegend        | Tb159                        |
| CXCR5                             | RF8B2                   | BD               | Gd158                        |
| HLADR                             | G46-6                   | BD               | Lu175                        |
| ICOS                              | DX29                    | BD               | Tm169                        |
| IgD                               | IA6-2                   | BioLegend        | Nd146                        |
| PD-1                              | EH12.1                  | BD               | Yb172                        |
| TCR $\gamma\delta$                | B1                      | BioLegend        | Yb171                        |



|                        |  |  |   |  |  |   |   |  |   |   |   |   |   |   |   |   |  |   |   |
|------------------------|--|--|---|--|--|---|---|--|---|---|---|---|---|---|---|---|--|---|---|
| MCP-1                  |  |  |   |  |  |   |   |  |   |   | X |   |   |   |   |   |  |   |   |
| MIG                    |  |  |   |  |  |   |   |  |   |   | X | X |   |   |   |   |  |   |   |
| MIP-1 $\alpha$         |  |  |   |  |  |   |   |  |   |   | X |   |   |   |   |   |  |   |   |
| MIP-1 $\beta$          |  |  |   |  |  |   |   |  |   |   | X |   |   |   |   |   |  |   |   |
| PAI-1                  |  |  |   |  |  |   |   |  |   |   |   |   |   | X |   | X |  |   |   |
| PDGF-BB                |  |  | X |  |  |   |   |  | X |   |   |   |   |   |   |   |  | X |   |
| SDF-1 $\alpha$         |  |  |   |  |  |   |   |  | X | X |   |   |   |   |   |   |  |   |   |
| sFasL                  |  |  |   |  |  | X | X |  |   |   |   |   |   |   |   |   |  |   |   |
| TNFR1                  |  |  |   |  |  | X |   |  |   |   |   |   |   |   |   |   |  |   |   |
| TNFR2                  |  |  |   |  |  | X |   |  |   |   |   |   |   |   |   |   |  |   |   |
| TRAIL                  |  |  |   |  |  | X |   |  |   |   |   |   |   |   |   |   |  |   |   |
| VCAM-1                 |  |  |   |  |  |   |   |  |   |   |   |   |   |   |   |   |  |   | X |
| VEGF-A                 |  |  | X |  |  |   |   |  |   |   |   |   |   |   |   |   |  | X |   |
| T Cells                |  |  |   |  |  |   |   |  |   |   |   |   | X |   |   |   |  |   |   |
| CD4+ Th17-type cells   |  |  |   |  |  |   |   |  |   |   |   |   |   | X |   |   |  |   |   |
| CCR6+ T Cells          |  |  |   |  |  |   |   |  |   |   |   |   |   |   | X |   |  |   |   |
| CD4+ Treg-type cells   |  |  |   |  |  |   |   |  |   |   |   |   |   |   | X |   |  |   |   |
| CD38+ CD4+ T cells     |  |  |   |  |  |   |   |  |   |   |   |   |   |   |   | X |  |   |   |
| CD38+ B cells          |  |  |   |  |  |   |   |  |   |   |   | X |   |   |   |   |  |   |   |
| HLA-DR+ Memory B Cells |  |  |   |  |  |   |   |  |   |   |   |   | X |   |   |   |  |   |   |
| CD86+ Memory B Cells   |  |  |   |  |  |   |   |  |   |   |   |   | X |   |   |   |  |   |   |

|                                     |  |  |   |  |  |  |  |  |  |  |  |   |  |   |   |  |  |  |  |  |
|-------------------------------------|--|--|---|--|--|--|--|--|--|--|--|---|--|---|---|--|--|--|--|--|
| CCR6+<br>Naïve B<br>cells           |  |  |   |  |  |  |  |  |  |  |  | X |  |   |   |  |  |  |  |  |
| CD38+<br>Naïve B<br>cells           |  |  |   |  |  |  |  |  |  |  |  | X |  |   |   |  |  |  |  |  |
| CD86+<br>Naïve B<br>cells           |  |  |   |  |  |  |  |  |  |  |  | X |  |   |   |  |  |  |  |  |
| HLA-DR+<br>Transition<br>al B Cells |  |  |   |  |  |  |  |  |  |  |  | X |  |   |   |  |  |  |  |  |
| Transition<br>al B Cells            |  |  |   |  |  |  |  |  |  |  |  | X |  |   |   |  |  |  |  |  |
| Plasmablas<br>ts                    |  |  | X |  |  |  |  |  |  |  |  | X |  |   |   |  |  |  |  |  |
| CD8lo<br>CD56 med<br>NK Cells       |  |  |   |  |  |  |  |  |  |  |  |   |  | X |   |  |  |  |  |  |
| CD38+<br>CXCR3+<br>DCs              |  |  |   |  |  |  |  |  |  |  |  |   |  |   | X |  |  |  |  |  |

## SUPPLEMENTAL FIGURE LEGEND.

**Supplemental Figure 1. Bivariate gating analysis scheme.** Bivariate plots were used to compare features of MMF+ and MMF- SLE patient PBMCs by mass cytometry. Density map correspond to proportional cell abundance for each population indicated above each plot. (A) Main cell populations were first gated off intact cells defined by iridium-intercalators. Intact singlets were defined using cell length, and live cells were gated on the absence of cisplatin staining. CD3 and CD19 were used to identify T cells and B cells. NKT cells were identified as CD3+CD56+ and CD4+ and CD8+ T cells were gated off of CD3+CD56- cells. B Cells were gated on CD27, IgD, CD24 and CD38 to identify DN B Cells (CD27-IgD-), transitional B cells (CD27-IgD+CD38+CD24+), Naïve B cells(CD27-IgD+CD38±CD24-), Non-switched memory B cells(CD27+IgD+), Switched memory B cells(CD27+IgD-CD38-) and plasmablasts (CD27+IgD-CD38+). Myeloid cells were gated off CD3-CD19- cells to gate pDCs (HLA-DR+CD11c-CD123+), classical monocytes (HLA-DR+CD11c+CD14+CD16-), intermediate monocytes (HLA-DR+CD11c+CD14+CD16+), non-classical monocytes (HLA-DR+CD11c+CD14-CD16+), and dendritic cells (HLA-DR+CD11c+CD14-). (B) NK cell subsets were gated off CD3-CD19- and then CD56+ cells. (C) T cells were gated off CD4+ or CD8+ for memory(CD45RA-) and naïve/effector(CD45RA+) cells, Treg-type cells(CD25+CD127-), Tfh-type cells(CXCR5+PD-1+), Th1-type cells (CXCR3+), Th17-type cells(CCR6+CD161+), CD57+ T cells. TCR $\gamma\delta$ + T cells were gated off CD3+CD56- cells.(D) Other myeloid cell subsets such as basophils (HLA-DR-CD11c-CD123+), conventional DCs(CD11b+ DCs), CXCR3+ DCs, and myeloid-derived suppressor cells (CD14+CD11b+CD33+HLA-DR-) were gated off CD3-CD19- gate.

# Supplemental Figure 1

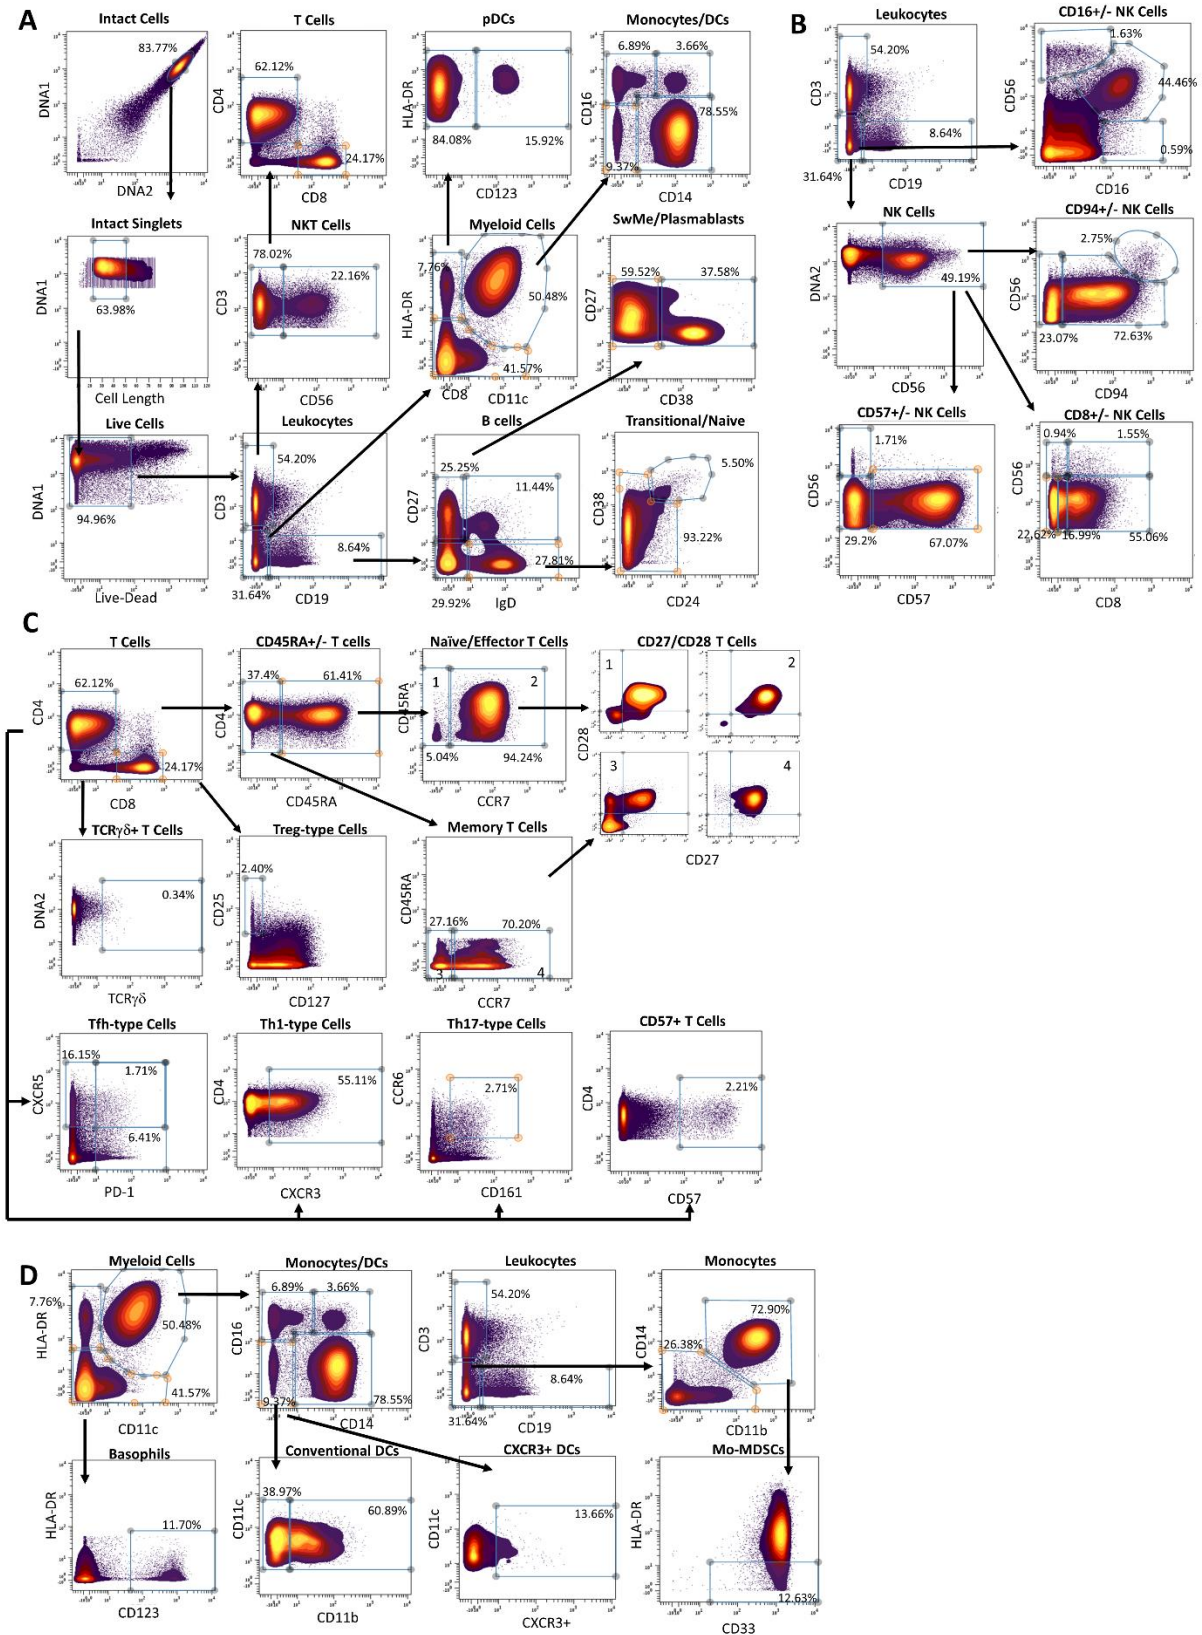

Supplement: jciinsight-4-124575-s162.pdf [file jciinsight-4-124575-s162.pdf]
